# Supplementary material for: Emerging Leishmania donovani Lineages Associated with Cutaneous Leishmaniasis, Himachal Pradesh, India, 2023
Source: PubMed Central journal article supplement (PMC11346985; doi:10.3201/eid3009.231595), 2024-09
Supplement: 23-1595-Techapp-s1.pdf [file 23-1595-Techapp-s1.pdf]

# Emerging *Leishmania donovani* Lineages Associated with Cutaneous Leishmaniasis, Himachal Pradesh, India, 2023

## Appendix

### Methods

LdHPCL71 and LdHPCL76 were isolated from CL patients belonging to Kinnaur (6050 m above sea level) and Rampur (1020 m above sea level) regions of Himachal Pradesh (figure s1) with a period of illness from 2.5 to 3 months respectively after the initial appearance of cutaneous manifestation and with no report of travel outside of the state around the disease occurrence time. Patient with LdHPCL71 was a 50-year-old female with a single erythematous, nodular plaque lesion while patient with LdHPCL76 was a 12-year-old girl with a single erythematous elevated popular lesion at the time of diagnosis and sample collection. Informed consent was obtained from the patients with due approval of the study by the Institutional Ethics Committee IGMC, Shimla, H.P., Approval no. HFW (MS) G-5 (Ethics)/2014-10886. Based on sequence analysis of ITS1 and 6 PGDH amplified product, the parasites were identified as *L. donovani*.

Lesional tissue biopsies were processed and parasites were cultured as previously described (1) and DNA was extracted from cultures using the standard phenol-chloroform method. DNA was sequenced using an Illumina Hi-Seq instrument in 150bp paired end mode, resulting in an average coverage of 59.6, a mean base quality of 35.8, a mean mapping quality of 53 and a breadth of coverage of 99.56 for LdHPCL71. Likewise, an average coverage of 147, a mean base quality of 35.9, a mean mapping quality of 54 and a breadth of coverage of 99.63 for LdHPCL76.

Whole-genome analysis was performed as previously described (1,2). Galaxy's bedtools was used to remove SNPs that are common in the ISC region using previously sequenced 'Yeti' parasites (Genbank accession numbers ERR206282 and ERR206270) and to identify SNPs that

were in common between LdHPCL71, LdHPCL76 and the previously identified LdHPCL66 parasites (*I*) (Genbank accession number: SRR13707160) (Appendix Table). Phylogeny analysis was performed as previously described (2,3). Briefly, the SNPs for all samples were combined and used to generate a neighbor-joining tree using the TASSEL software in Newick format. ItoL was then used to display this tree.

## References

1. Lypaczewski P, Thakur L, Jain A, Kumari S, Paulini K, Matlashewski G, et al. An intraspecies *Leishmania donovani* hybrid from the Indian subcontinent is associated with an atypical phenotype of cutaneous disease. *iScience*. 2022;25:103802. [PubMed](https://doi.org/10.1016/j.isci.2022.103802) <https://doi.org/10.1016/j.isci.2022.103802>
2. Paulini K, Lypaczewski P, Zhang WW, Perera DJ, Ndao M, Matlashewski G. Investigating the *Leishmania donovani* *sacp* gene and its role in macrophage infection and survival in mice. *Trop Med Infect Dis*. 2022;7:384. [PubMed](https://doi.org/10.3390/tropicalmed7110384) <https://doi.org/10.3390/tropicalmed7110384>
3. Lypaczewski P, Matlashewski G. *Leishmania donovani* hybridisation and introgression in nature: a comparative genomic investigation. *Lancet Microbe*. 2021;2:e250–8. [PubMed](https://doi.org/10.1016/S2666-5247(21)00028-8) [https://doi.org/10.1016/S2666-5247\(21\)00028-8](https://doi.org/10.1016/S2666-5247(21)00028-8)

**Appendix Table.** Common SNPs between LdHPCL71, LdHPCL76 and LdHPCL66\*

| Chrm | Gene ID        | Product Description                                                | SNP (gene)         | SNP (protein)           |
|------|----------------|--------------------------------------------------------------------|--------------------|-------------------------|
| 1    | LdCL_010010600 | hypothetical protein                                               | 172A>G             | Asn58Asp                |
|      | LdCL_010012500 | Meckel syndrome type 6 protein, putative                           | 604A>C             | Thr202Pro               |
| 2    | LdCL_020008400 | glycosyl transferase, putative                                     | 1519C>T            | Arg507Trp               |
|      | LdCL_020009200 | Mitochondrial protein 81                                           | 574C>A             | Pro192Thr               |
|      | LdCL_020009900 | hypothetical protein                                               | 1387A>C            | Ser463Arg               |
| 3    | LdCL_020012500 | dehydrogenase/oxidoreductase-like protein                          | 103A>G             | Asn35Asp                |
|      | LdCL_030008400 | hypothetical protein                                               | 2329A>G            | Thr777Ala               |
|      | LdCL_030010000 | hypothetical protein                                               | 7346G>A            | Arg2449Gln              |
|      | LdCL_030010600 | quinone oxidoreductase, putative                                   | 593T>C             | Val198Ala               |
|      | LdCL_030012800 | serine/threonine-protein kinase, putative                          | 6776C>T<br>2000T>C | Pro2259Leu<br>Val667Ala |
| 4    | LdCL_040008000 | Tetratricopeptide repeat, putative                                 | 799T>C             | Phe267Leu               |
|      | LdCL_040011100 | DENN (AEX-3) domain containing protein, putative                   | 3655G>A            | Asp1219Asn              |
|      | LdCL_040012000 | Zinc finger, C3HC4 type (RING finger) containing protein, putative | 137A>G             | Asn46Ser                |
| 5    | LdCL_050012200 | CYC2-like cyclin, putative                                         | 1664C>G            | Ala555Gly               |
|      | LdCL_050014700 | metallo-peptidase, Clan M-, Family M49                             | 798G>T             | Gln266His               |
|      | LdCL_050016900 | hypothetical protein                                               | 127C>A             | Leu43Ile                |
| 6    | LdCL_060007900 | hypothetical protein                                               | 1220A>G            | Gln407Arg               |
|      | LdCL_060010700 | hypothetical protein                                               | 508A>G             | Thr170Ala               |
|      | LdCL_060014400 | Protein phosphatase 2C, putative                                   | 3422A>G            | Asp1141Gly              |
|      | LdCL_060014800 | TLD, putative                                                      | 986A>G             | His329Arg               |
| 7    | LdCL_070007300 | hypothetical protein                                               | 566C>T             | Thr189Ile               |
|      | LdCL_070010300 | Dynein heavy chain, N-terminal region 2, putative                  | 11969A>G           | His3990Arg              |
|      | LdCL_070013700 | hypothetical protein                                               | 604G>T             | Val202Leu               |
|      | LdCL_070014600 | hypothetical protein                                               | 5707G>T            | Val1903Leu              |

| Chrm | Gene ID        | Product Description                                                                | SNP (gene) | SNP (protein) |
|------|----------------|------------------------------------------------------------------------------------|------------|---------------|
|      | LdCL_070015000 | protein kinase, putative                                                           | 5767A>G    | Met1923Val    |
|      | LdCL_070015700 | protein of unknown function (DUF3437), putative                                    | 1961A>T    | Glu654Val     |
|      | LdCL_070015800 | hypothetical protein                                                               | 562G>C     | Val188Leu     |
|      | LdCL_070016500 | DNA repair and recombination helicase protein PIF7, putative                       | 2369G>A    | Gly790Asp     |
|      | LdCL_070018000 | proteasome regulatory non-ATP-ase subunit, putative                                | 2837C>T    | Pro946Leu     |
| 8    | LdCL_080008400 | hypothetical protein                                                               | 866C>T     | Ala289Val     |
|      | LdCL_080008800 | hypothetical protein                                                               | 9420G>A    | Met3140Ile    |
|      | LdCL_080008900 | hypothetical protein                                                               | 1376A>C    | Gln459Pro     |
|      | LdCL_080010200 | hypothetical protein                                                               | 284G>T     | Gly95Val      |
|      | LdCL_080017100 | hypothetical protein                                                               | 1864C>T    | Arg622Cys     |
|      | LdCL_080017800 | hypothetical protein                                                               | 169C>T     | Pro57Ser      |
|      | LdCL_080018500 | hypothetical protein                                                               | 1297C>T    | Pro433Ser     |
| 9    | LdCL_090009900 | Plus-3 domain/Zinc finger, C3HC4 type (RING finger) containing protein, putative   | 1297C>T    | Pro433Ser     |
|      | LdCL_090010200 | hypothetical protein                                                               | 408A>C     | Lys136Asn     |
|      | LdCL_090011800 | hypothetical protein                                                               | 2014G>A    | Gly672Ser     |
|      | LdCL_090015900 | hypothetical protein                                                               | 727G>A     | Ala243Thr     |
|      | LdCL_090018800 | hypothetical protein                                                               | 1594C>T    | Arg532Cys     |
|      | LdCL_090018900 | hypothetical protein                                                               | 916A>G     | Thr306Ala     |
|      | LdCL_090019000 | hypothetical protein                                                               | 2198G>A    | Gly733Asp     |
|      | LdCL_090021500 | ABC transporter, putative                                                          | 130A>G     | Met44Val      |
| 10   | LdCL_100017300 | hypothetical protein                                                               | 2744C>T    | Ser915Phe     |
|      | LdCL_100018100 | protein of unknown function (DUF1042), putative                                    | 55A>G      | Ile19Val      |
|      | LdCL_100018600 | hypothetical protein                                                               | 2204C>T    | Ala735Val     |
| 11   | LdCL_110005200 | Bacterial transferase hexapeptide (six repeats), putative                          | 1786A>T    | Ile596Leu     |
|      | LdCL_110012800 | hypothetical protein                                                               | 994G>A     | Gly332Arg     |
| 12   | LdCL_120006300 | hypothetical protein                                                               | 280G>A     | Val94Ile      |
|      | LdCL_120006600 | leucine-rich repeat protein, putative                                              | 1558G>A    | Val520Ile     |
|      | LdCL_120006700 | dolichyl-P-Man:GDP-Man5GlcNAc2-PP-dolichyl alpha-1,2-mannosyltransferase, putative | 2308G>T    | Ala770Ser     |
|      | LdCL_120006900 | hypothetical protein                                                               | 1046C>T    | Ala349Val     |
|      | LdCL_120008000 | hypothetical protein                                                               | 1744C>T    | His582Tyr     |
|      | LdCL_120009800 | hypothetical protein                                                               | 2840C>T    | Ala947Val     |
|      | LdCL_120009900 | hypothetical protein                                                               | 821G>A     | Arg274Gln     |
|      | LdCL_120011100 | Fusaric acid resistance protein-like, putative                                     | 1945G>A    | Glu649Lys     |
|      | LdCL_120012600 | surface antigen protein 2, putative                                                | 2207G>A    | Arg736Gln     |
|      | LdCL_120012900 | hypothetical protein                                                               | 40C>T      | Pro14Ser      |
|      | LdCL_120013300 | hypothetical protein                                                               | 2128T>C    | Ter710Arg     |
|      | LdCL_120013800 | hypothetical protein                                                               | 475C>T     | Leu159Phe     |
|      | LdCL_120014300 | hypothetical protein                                                               | 5183A>G    | His1728Arg    |
|      | LdCL_120014800 | hypothetical protein                                                               | 1069G>C    | Gly357Arg     |
|      | LdCL_120015300 | hypothetical protein                                                               | 1835T>C    | Val612Ala     |
|      | LdCL_120015500 | surface antigen protein 2, putative                                                | 1802T>C    | Val601Ala     |
|      | LdCL_120016300 | hypothetical protein                                                               | 1802T>C    | Val601Ala     |
|      | LdCL_120016800 | hypothetical protein                                                               | 1802T>C    | Val601Ala     |
|      | LdCL_120017300 | hypothetical protein                                                               | 1802T>C    | Val601Ala     |
|      | LdCL_120017900 | surface antigen protein 2, putative                                                | 1802T>C    | Val601Ala     |
|      | LdCL_120018500 | hypothetical protein                                                               | 1934A>T    | Tyr645Phe     |
| 13   | LdCL_130009300 | ATP-dependent RNA helicase, putative                                               | 340A>G     | Lys114Glu     |
|      | LdCL_130012700 | hypothetical protein                                                               | 418A>G     | Ile140Val     |
|      | LdCL_130012800 | hypothetical protein                                                               | 1049T>C    | Val350Ala     |
|      | LdCL_130015900 | calmodulin, putative                                                               | 2479C>G    | Gln827Glu     |
|      | LdCL_130016200 | adenylosuccinate synthetase, putative                                              | 380G>A     | Arg127His     |
|      | LdCL_130018600 | hypothetical protein                                                               | 347C>T     | Thr116Met     |
|      | LdCL_130019600 | PIN domain containing protein, putative                                            | 755T>C     | Val252Ala     |
|      | LdCL_130019900 | ATPase family associated with various cellular activities (AAA), putative          | 1758C>G    | His586Gln     |
| 14   | LdCL_140007200 | hypothetical protein                                                               | 886G>T     | Ala296Ser     |
|      | LdCL_140007300 | hypothetical protein                                                               | 283G>A     | Gly95Ser      |
|      | LdCL_140008700 | hypothetical protein                                                               | 319A>C     | Ser107Arg     |
|      | LdCL_140011500 | hypothetical protein                                                               | 3825C>A    | Ser1275Arg    |
|      |                |                                                                                    | 2983G>A    | Glu995Lys     |

| Chrm | Gene ID        | Product Description                                                                                                | SNP (gene) | SNP (protein) |
|------|----------------|--------------------------------------------------------------------------------------------------------------------|------------|---------------|
|      | LdCL_140013600 | hypothetical protein                                                                                               | 469C>A     | Arg157Ser     |
|      | LdCL_140019600 | hypothetical protein                                                                                               | 1786G>A    | Gly596Arg     |
|      | LdCL_140020000 | TPR repeat/DnaJ domain containing protein, putative                                                                | 1078G>A    | Ala360Thr     |
|      |                |                                                                                                                    | 1705G>C    | Glu569Gln     |
| 15   | LdCL_150014600 | hypothetical protein                                                                                               | 1460A>G    | His487Arg     |
|      | LdCL_150015900 | DNA repair protein Rad9, putative                                                                                  | 1662C>G    | His554Gln     |
|      | LdCL_150018800 | actin-like protein, putative                                                                                       | 529G>A     | Val177Ile     |
| 16   | LdCL_160005100 | hypothetical protein                                                                                               | 1022A>G    | His341Arg     |
|      | LdCL_160019700 | EMG1/NEP1 methyltransferase, putative                                                                              | 688T>C     | Phe230Leu     |
|      | LdCL_160022500 | Clustered mitochondria/Translation initiation factor eIF3 subunit 135, putative                                    | 2008G>C    | Val670Leu     |
|      | LdCL_160022600 | Flagellar Member 3                                                                                                 | 2098G>T    | Ala700Ser     |
| 17   | LdCL_170009100 | hypothetical protein                                                                                               | 398G>A     | Arg133Gln     |
|      | LdCL_170014000 | hypothetical protein                                                                                               | 874G>A     | Ala292Thr     |
|      | LdCL_170014300 | hypothetical protein                                                                                               | 508A>G     | Thr170Ala     |
|      | LdCL_170016200 | ATP-dependent RNA helicase, putative                                                                               | 2552C>T    | Ser851Leu     |
|      | LdCL_170018400 | NOL1/NOP2/sun family, putative                                                                                     | 1505A>G    | His502Arg     |
| 18   | LdCL_180005300 | major facilitator superfamily protein (MFS), putative                                                              | 463T>G     | Phe155Val     |
| 19   | LdCL_190016500 | hypothetical protein                                                                                               | 3357G>T    | Gln1119His    |
|      | LdCL_190017400 | hypothetical protein                                                                                               | 2917C>T    | His973Tyr     |
| 20   | LdCL_200005900 | Ion channel/Calcium-activated BK potassium channel alpha subunit, putative                                         | 1879A>G    | Thr627Ala     |
|      | LdCL_200008700 | Sugar (and other) transporter/Major Facilitator Superfamily, putative                                              | 10A>G      | Thr4Ala       |
|      | LdCL_200009500 | hypothetical protein                                                                                               | 3074G>A    | Arg1025Lys    |
|      | LdCL_200009800 | AlG2-like family, putative                                                                                         | 1015G>A    | Gly339Ser     |
|      | LdCL_200011100 | hypothetical protein                                                                                               | 1285C>T    | Arg429Cys     |
|      | LdCL_200012500 | protein kinase, putative                                                                                           | 9772G>A    | Glu3258Lys    |
|      | LdCL_200012700 | tubulin-tyrosine ligase, putative                                                                                  | 523C>G     | Gln175Glu     |
|      | LdCL_200015200 | hypothetical protein                                                                                               | 904A>G     | Thr302Ala     |
| 21   | LdCL_210011900 | phosphoglucomutase, putative                                                                                       | 1760T>C    | Val587Ala     |
|      | LdCL_210024400 | NIMA-related kinase, putative                                                                                      | 1562A>G    | Lys521Arg     |
|      | LdCL_210027900 | hypothetical protein                                                                                               | 1349C>T    | Pro450Leu     |
| 22   | LdCL_220011900 | 3'a2rel-related protein                                                                                            | 1121C>A    | Pro374Gln     |
|      | LdCL_220013400 | Translation initiation factor SU11, putative                                                                       | 1888A>G    | Ile630Val     |
|      | LdCL_220014100 | 3'a2rel-related protein                                                                                            | 1121C>A    | Pro374Gln     |
|      | LdCL_220014200 | Protein of unknown function (DUF3184), putative                                                                    | 121C>G     | His411Asp     |
|      | LdCL_220014400 | hypothetical protein                                                                                               | 2118A>G    | Ter706Trp     |
|      | LdCL_220015900 | Galactose oxidase, central domain/Kelch motif containing protein, putative                                         | 3497T>C    | Leu1166Pro    |
|      | LdCL_220016600 | Zinc finger, C3HC4 type (RING finger) containing protein, putative                                                 | 6971T>C    | Val2324Ala    |
|      | LdCL_220018800 | hypothetical protein                                                                                               | 4750A>G    | Thr1584Ala    |
|      | LdCL_220019500 | hypothetical protein                                                                                               | 193A>G     | Asn65Asp      |
|      | LdCL_220021600 | exosome complex exonuclease RRP45-like, putative                                                                   | 300C>A     | Asp100Glu     |
| 23   | LdCL_230006200 | Concanavalin A-like lectin/glucanases superfamily/Beige/BEACH domain containing protein, putative                  | 3221A>G    | Gln1074Arg    |
| 24   | LdCL_240007800 | hypothetical protein                                                                                               | 2831C>T    | Thr944Met     |
|      | LdCL_240008700 | ppg3-related protein-like protein                                                                                  | 2698T>C    | Ser900Pro     |
|      | LdCL_240012100 | hypothetical protein                                                                                               | 1888A>G    | Ile630Val     |
|      | LdCL_240014500 | hypothetical protein                                                                                               | 2411C>T    | Ala804Val     |
|      | LdCL_240019900 | kinesin, putative                                                                                                  | 2782G>A    | Gly928Arg     |
|      | LdCL_240020300 | ABC transporter transmembrane region/ABC transporter, putative                                                     | 6566C>T    | Thr2189Met    |
|      | LdCL_240028200 | Protein of unknown function N-terminal domain (DUF2450)/Protein of unknown function C-terminus (DUF2451), putative | 1534G>C    | Val512Leu     |
| 25   | LdCL_250006000 | Qc-SNARE protein, putative                                                                                         | 113G>A     | Arg38His      |
|      | LdCL_250009000 | hypothetical protein                                                                                               | 262G>C     | Ala88Pro      |
|      | LdCL_250010000 | Myosin head (motor domain), putative                                                                               | 3910C>A    | Pro1304Thr    |
|      |                |                                                                                                                    | 152A>G     | Tyr51Cys      |
|      | LdCL_250013600 | DNL zinc finger containing protein, putative                                                                       | 338C>A     | Ser113Tyr     |
|      | LdCL_250014100 | hypothetical protein                                                                                               | 553A>C     | Ser185Arg     |
|      | LdCL_250014200 | hypothetical protein                                                                                               | 2106G>T    | Met702Ile     |
|      | LdCL_250015000 | hypothetical protein                                                                                               | 1668G>T    | Met556Ile     |

| Chrm | Gene ID        | Product Description                                                                                                                                                                                   | SNP (gene) | SNP (protein) |
|------|----------------|-------------------------------------------------------------------------------------------------------------------------------------------------------------------------------------------------------|------------|---------------|
|      | LdCL_250015400 | dynein heavy chain, putative                                                                                                                                                                          | 7066A>G    | Met2356Val    |
|      |                |                                                                                                                                                                                                       | 7840G>A    | Val2614Ile    |
|      | LdCL_250015600 | hypothetical protein                                                                                                                                                                                  | 142G>T     | Val48Phe      |
|      | LdCL_250019700 | TAP42-like family, putative                                                                                                                                                                           | 496G>A     | Glu166Lys     |
|      | LdCL_250023700 | hypothetical protein                                                                                                                                                                                  | 242G>T     | Arg81Met      |
|      | LdCL_250029800 | Pex2 / Pex12 amino terminal region/Zinc finger, C3HC4 type (RING finger)/Ring finger domain/zinc-RING finger domain/Anaphase-promoting complex subunit 11 RING-H2 finger containing protein, putative | 170C>T     | Thr57Ile      |
| 26   | LdCL_260009000 | hypothetical protein                                                                                                                                                                                  | 5398T>G    | Ser1800Ala    |
|      | LdCL_260013400 | type II (glutathione peroxidase-like) tryparedoxin peroxidase                                                                                                                                         | 494T>C     | Phe165Ser     |
|      | LdCL_260015600 | dynein heavy chain, putative                                                                                                                                                                          | 7304A>C    | Asp2435Ala    |
|      |                |                                                                                                                                                                                                       | 8242G>A    | Val2748Met    |
|      | LdCL_260015800 | hypothetical protein                                                                                                                                                                                  | 191C>A     | Thr64Lys      |
|      | LdCL_260016100 | hypothetical protein                                                                                                                                                                                  | 1412A>G    | Asn471Ser     |
|      | LdCL_260016700 | hypothetical protein                                                                                                                                                                                  | 1939A>G    | Thr647Ala     |
|      | LdCL_260017300 | hypothetical protein                                                                                                                                                                                  | 3560A>G    | Gln1187Arg    |
|      |                |                                                                                                                                                                                                       | 5165T>G    | Phe1722Cys    |
|      | LdCL_260020500 | hypothetical protein                                                                                                                                                                                  | 95G>C      | Arg32Pro      |
|      | LdCL_260028500 | hypothetical protein                                                                                                                                                                                  | 490C>G     | His164Asp     |
|      | LdCL_260030900 | hypothetical protein                                                                                                                                                                                  | 1380G>A    | Met460Ile     |
| 27   | LdCL_270009900 | calpain-like cysteine peptidase, putative                                                                                                                                                             | 11552C>T   | Pro3851Leu    |
|      | LdCL_270010000 | calpain-like cysteine peptidase, putative                                                                                                                                                             | 437G>C     | Gly146Ala     |
|      | LdCL_270010100 | radial spoke protein 3, putative                                                                                                                                                                      | 1033C>T    | Arg345Cys     |
|      | LdCL_270021400 | diacylglycerol acyltransferase, putative                                                                                                                                                              | 2506G>C    | Val836Leu     |
|      | LdCL_270022400 | BRO1-like domain/ALIX V-shaped domain binding to HIV, putative                                                                                                                                        | 681G>A     | Met227Ile     |
|      | LdCL_270022700 | molybdopterin synthase sulfurylase-like protein, putative                                                                                                                                             | 71A>C      | Lys24Thr      |
|      | LdCL_270023700 | Frag1/DRAM/Sfk1 family, putative                                                                                                                                                                      | 2765C>T    | Ala922Val     |
|      | LdCL_270024100 | protein kinase-like protein                                                                                                                                                                           | 125T>C     | Leu42Ser      |
|      | LdCL_270024600 | Dual specificity phosphatase, catalytic domain containing protein, putative                                                                                                                           | 4714G>C    | Ala1572Pro    |
|      | LdCL_270024800 | hypothetical protein                                                                                                                                                                                  | 2288A>G    | His763Arg     |
|      | LdCL_270026700 | branched-chain amino acid aminotransferase, putative                                                                                                                                                  | 556G>A     | Ala186Thr     |
|      | LdCL_270026800 | branched-chain amino acid aminotransferase, putative                                                                                                                                                  | 556G>A     | Ala186Thr     |
|      | LdCL_270029500 | acyl-CoA oxidase, putative                                                                                                                                                                            | 1711C>T    | Pro571Ser     |
| 28   | LdCL_270033000 | dynein heavy chain, putative                                                                                                                                                                          | 7237G>A    | Asp2413Asn    |
|      | LdCL_280013000 | RNA polymerase I                                                                                                                                                                                      | 885C>A     | Ser295Arg     |
|      | LdCL_280017300 | Leucine Rich repeat, putative                                                                                                                                                                         | 961A>C     | Ile321Leu     |
|      | LdCL_280020000 | DNA polymerase kappa, putative                                                                                                                                                                        | 542C>G     | Ala181Gly     |
|      | LdCL_280030700 | WW domain containing protein, putative                                                                                                                                                                | 3938C>G    | Ser1313Cys    |
|      | LdCL_280031400 | Putative serine esterase (DUF676), putative                                                                                                                                                           | 440G>T     | Gly147Val     |
| 29   | LdCL_290008200 | Putative GTPase activating protein for Arf, putative                                                                                                                                                  | 221G>A     | Arg74His      |
|      | LdCL_290010100 | hypothetical protein                                                                                                                                                                                  | 13G>A      | Ala5Thr       |
|      | LdCL_290010300 | Exonuclease, putative                                                                                                                                                                                 | 886C>T     | Pro296Ser     |
|      | LdCL_290010400 | Exonuclease, putative                                                                                                                                                                                 | 1024T>C    | Ser342Pro     |
|      | LdCL_290021200 | hypothetical protein                                                                                                                                                                                  | 691A>C     | Ser231Arg     |
|      | LdCL_290024700 | diphthamide synthesis protein, putative                                                                                                                                                               | 929A>C     | Asp310Ala     |
|      | LdCL_290026400 | hypothetical protein                                                                                                                                                                                  | 828G>C     | Gln276His     |
|      | LdCL_290029100 | hypothetical protein                                                                                                                                                                                  | 1216C>T    | Pro406Ser     |
| 30   | LdCL_300019900 | ama1 protein, putative                                                                                                                                                                                | 116A>C     | Asn39Thr      |
|      |                |                                                                                                                                                                                                       | 128G>A     | Ser43Asn      |
|      |                |                                                                                                                                                                                                       | 135C>G     | Asp45Glu      |
|      | LdCL_300020800 | Rad17 cell cycle checkpoint protein, putative                                                                                                                                                         | 2584G>A    | Val862Met     |
|      | LdCL_300029500 | hypothetical protein                                                                                                                                                                                  | 9379A>G    | Asn3127Asp    |
|      | LdCL_300030200 | heat shock 70-related protein 1, mitochondrial precursor, putative                                                                                                                                    | 1410A>C    | Lys470Asn     |
|      |                |                                                                                                                                                                                                       | 1408A>G    | Lys470Glu     |
|      |                |                                                                                                                                                                                                       | 1405T>G    | Ser469Ala     |
|      |                |                                                                                                                                                                                                       | 1399G>A    | Val467Ile     |
|      | LdCL_300031900 | hypothetical protein                                                                                                                                                                                  | 1730A>G    | Lys577Arg     |
|      | LdCL_300036400 | eukaryotic translation initiation factor 3 subunit 7-like protein                                                                                                                                     | 315G>T     | Lys105Asn     |
|      | LdCL_300040500 | DNA ligase I, putative                                                                                                                                                                                | 103G>C     | Asp35His      |

| Chrm           | Gene ID                               | Product Description                                                                                                               | SNP (gene)                                  | SNP (protein) |           |
|----------------|---------------------------------------|-----------------------------------------------------------------------------------------------------------------------------------|---------------------------------------------|---------------|-----------|
| 31             | LdCL_300042600                        | V-type ATPase, C subunit, putative                                                                                                | 26C>A                                       | Pro9Gln       |           |
|                | LdCL_310008300                        | CRAL/TRIO domain containing protein, putative                                                                                     | 2320T>G                                     | Ser774Ala     |           |
|                | LdCL_310011200                        | hypothetical protein                                                                                                              | 1723T>G                                     | Ser575Ala     |           |
|                |                                       |                                                                                                                                   | 1151C>T                                     | Ala384Val     |           |
|                | LdCL_310019000                        | Protein of unknown function (DUF3638)/Protein of unknown function (DUF3645)/Zn-finger in Ran binding protein and others, putative | 1646A>C                                     | Lys549Thr     |           |
|                | LdCL_310021600                        | hypothetical protein                                                                                                              | 154G>A                                      | Ala52Thr      |           |
|                | LdCL_310025200                        | hypothetical protein                                                                                                              | 389G>T                                      | Gly130Val     |           |
|                | LdCL_310027600                        | transcription like protein nupm1, putative                                                                                        | 1384G>A                                     | Gly462Arg     |           |
|                | LdCL_310040700                        | hypothetical protein                                                                                                              | 437C>T                                      | Ala146Val     |           |
|                | LdCL_310041200                        | hypothetical protein                                                                                                              | 2338G>A                                     | Glu780Lys     |           |
|                | 32                                    | LdCL_320018700                                                                                                                    | PTHB1 N-terminus/PTHB1 C-terminus, putative | 2750C>T       | Ser917Phe |
|                |                                       | LdCL_320025500                                                                                                                    | hypothetical protein                        | 1693G>A       | Val565Met |
|                |                                       | LdCL_320031100                                                                                                                    | hypothetical protein                        | 2783C>T       | Pro928Leu |
|                |                                       | LdCL_320031300                                                                                                                    | NOL1/NOP2/sun family, putative              | 674C>T        | Pro225Leu |
| LdCL_320034300 |                                       | hypothetical protein                                                                                                              | 535G>A                                      | Ala179Thr     |           |
| LdCL_320034800 |                                       | Guanine nucleotide exchange factor in Golgi transport N-terminal/Sec7 domain containing protein, putative                         | 2248A>G                                     | Thr750Ala     |           |
| LdCL_320038900 |                                       | hypothetical protein                                                                                                              | 4030C>T                                     | Arg1344Cys    |           |
| LdCL_320042200 |                                       | Uncharacterized protein family UPF0564, putative                                                                                  | 191C>T                                      | Pro64Leu      |           |
| 33             |                                       | LdCL_330009400                                                                                                                    | hypothetical protein                        | 903G>T        | Lys301Asn |
|                |                                       | LdCL_330010500                                                                                                                    | hypothetical protein                        | 1412G>T       | Gly471Val |
|                | LdCL_330020600                        | QA-SNARE protein putative                                                                                                         | 26C>T                                       | Ser9Phe       |           |
|                | LdCL_330031000                        | hypothetical protein                                                                                                              | 2729C>T                                     | Ala910Val     |           |
|                | LdCL_330032400                        | ras-like small GTPase, putative                                                                                                   | 7A>C                                        | Ser3Arg       |           |
|                | LdCL_330036100                        | hypothetical protein                                                                                                              | 304G>A                                      | Asp102Asn     |           |
|                | LdCL_330036300                        | Concanavalin A-like lectin/glucanases superfamily/Beige/BEACH domain containing protein, putative                                 | 10099G>A                                    | Gly3367Arg    |           |
|                | LdCL_330039900                        | Flagellar Member 8                                                                                                                | 7413G>T                                     | Gln2471His    |           |
|                | 34                                    | LdCL_340005500                                                                                                                    | DnaJ domain containing protein, putative    | 611C>T        | Ala204Val |
|                |                                       | LdCL_340006300                                                                                                                    | adenylate kinase, putative                  | 228G>C        | Glu76Asp  |
| LdCL_340007300 |                                       | Antimony resistance marker of 58 kDa                                                                                              | 188A>G                                      | Tyr63Cys      |           |
| LdCL_340008100 |                                       | calpain-like cysteine peptidase, putative                                                                                         | 1189C>A                                     | His397Asn     |           |
| LdCL_340008900 |                                       | DNA-directed RNA polymerase III subunit C1, putative                                                                              | 4053G>T                                     | Glu1351Asp    |           |
| LdCL_340015900 |                                       | amastin-like protein                                                                                                              | 40T>C                                       | Cys14Arg      |           |
| LdCL_340020500 |                                       | hypothetical protein                                                                                                              | 1642C>G                                     | Arg548Gly     |           |
| LdCL_340020700 |                                       | hypothetical protein                                                                                                              | 5018G>A                                     | Arg1673His    |           |
| LdCL_340027100 |                                       | hypothetical protein                                                                                                              | 4148C>G                                     | Ala1383Gly    |           |
| LdCL_340032200 |                                       | phospholipid-transporting ATPase-like protein                                                                                     | 4033G>T                                     | Val1345Leu    |           |
| 35             | LdCL_340045300                        | hypothetical protein                                                                                                              | 2264C>A                                     | Thr755Lys     |           |
|                | LdCL_340048800                        | hypothetical protein                                                                                                              | 4751C>T                                     | Thr1584Ile    |           |
|                |                                       |                                                                                                                                   | 6670G>A                                     | Val2224Met    |           |
|                | LdCL_340050300                        | Unc104-like kinesin, putative                                                                                                     | 566C>A                                      | Thr189Lys     |           |
|                | LdCL_350009500                        | Arrestin (or S-antigen), N-terminal domain containing protein, putative                                                           | 357G>T                                      | Glu119Asp     |           |
|                | LdCL_350020500                        | hypothetical protein                                                                                                              | 2684C>T                                     | Pro895Leu     |           |
|                | LdCL_350021000                        | hypothetical protein                                                                                                              | 530C>T                                      | Ser177Leu     |           |
|                | LdCL_350023000                        | Eukaryotic rRNA processing protein EBP2, putative                                                                                 | 506G>A                                      | Arg169Gln     |           |
|                | LdCL_350030900                        | cytochrome P450 reductase, putative                                                                                               | 531A>C                                      | Glu177Asp     |           |
|                | LdCL_350045100                        | U5 snRNA-associated splicing factor                                                                                               | 6981G>T                                     | Lys2327Asn    |           |
| 36             | LdCL_350045500                        | mitochondrial carrier protein, putative                                                                                           | 471G>C                                      | Glu157Asp     |           |
|                | LdCL_350052200                        | hypothetical protein                                                                                                              | 329T>G                                      | Leu110Arg     |           |
|                | LdCL_350055700                        | hypothetical protein                                                                                                              | 2212A>G                                     | Thr738Ala     |           |
|                | LdCL_360022900                        | tRNA pseudouridine synthase A, putative                                                                                           | 2417G>C                                     | Ser806Thr     |           |
|                | LdCL_360023700                        | hypothetical protein                                                                                                              | 2801C>G                                     | Ala934Gly     |           |
|                | LdCL_360024400                        | MORN repeat, putative                                                                                                             | 1546C>T                                     | Pro516Ser     |           |
|                | LdCL_360032100                        | hypothetical protein                                                                                                              | 353T>C                                      | Leu118Ser     |           |
|                | LdCL_360034000                        | protein kinase, putative                                                                                                          | 10247C>T                                    | Ala3416Val    |           |
|                | LdCL_360037300                        | NUC194 domain/Phosphatidylinositol 3- and 4-kinase, putative                                                                      | 4312G>A                                     | Ala1438Thr    |           |
|                |                                       |                                                                                                                                   | 3478T>C                                     | Trp1160Arg    |           |
| LdCL_360039000 | hypothetical protein                  | 1777G>A                                                                                                                           | Val593Met                                   |               |           |
| LdCL_360050900 | oxidoreductase, putative              | 749A>C                                                                                                                            | Lys250Thr                                   |               |           |
| LdCL_360051600 | paraflagellar rod component, putative | 2053A>G                                                                                                                           | Thr685Ala                                   |               |           |

| Chrm | Gene ID        | Product Description                               | SNP (gene) | SNP (protein) |
|------|----------------|---------------------------------------------------|------------|---------------|
|      | LdCL_360052300 | trypanothione synthetase-like protein             | 1010C>G    | Pro337Arg     |
|      | LdCL_360055600 | hypothetical protein                              | 686T>C     | Val229Ala     |
|      | LdCL_360056400 | Alpha/beta hydrolase family, putative             | 1835T>C    | Phe612Ser     |
|      | LdCL_360056800 | hypothetical protein                              | 544C>T     | Pro182Ser     |
|      | LdCL_360058500 | hypothetical protein                              | 4556A>G    | Tyr1519Cys    |
|      |                |                                                   | 58G>A      | Asp20Asn      |
|      | LdCL_360069200 | kinetoplast DNA-associated protein, putative      | 479A>C     | Lys160Thr     |
|      | LdCL_360071100 | centrin, putative                                 | 133G>T     | Asp45Tyr      |
|      | LdCL_360072300 | flagellum transition zone component, putative     | 1087C>G    | Leu363Val     |
|      | LdCL_360072400 | ADP-ribosylation factor-like protein 3b, putative | 166G>A     | Val56Ile      |
|      | LdCL_360075200 | protein of unknown function (DUF4496), putative   | 1060G>C    | Asp354His     |
|      | LdCL_360080800 | hypothetical protein                              | 250A>G     | Thr84Ala      |
|      | LdCL_360086100 | acetyltransferase, putative                       | 82A>G      | Asn28Asp      |

\*All SNPs from chromosome 1-36 along with the gene ID from [TriTrypDB](#), gene name, genomic location of the SNP and protein location of the SNP are found in this table. SNPs relating to the ISC1 Yeti region were removed by intersecting with SNPs found in the samples with accession numbers ERR206282 and ERR206270.

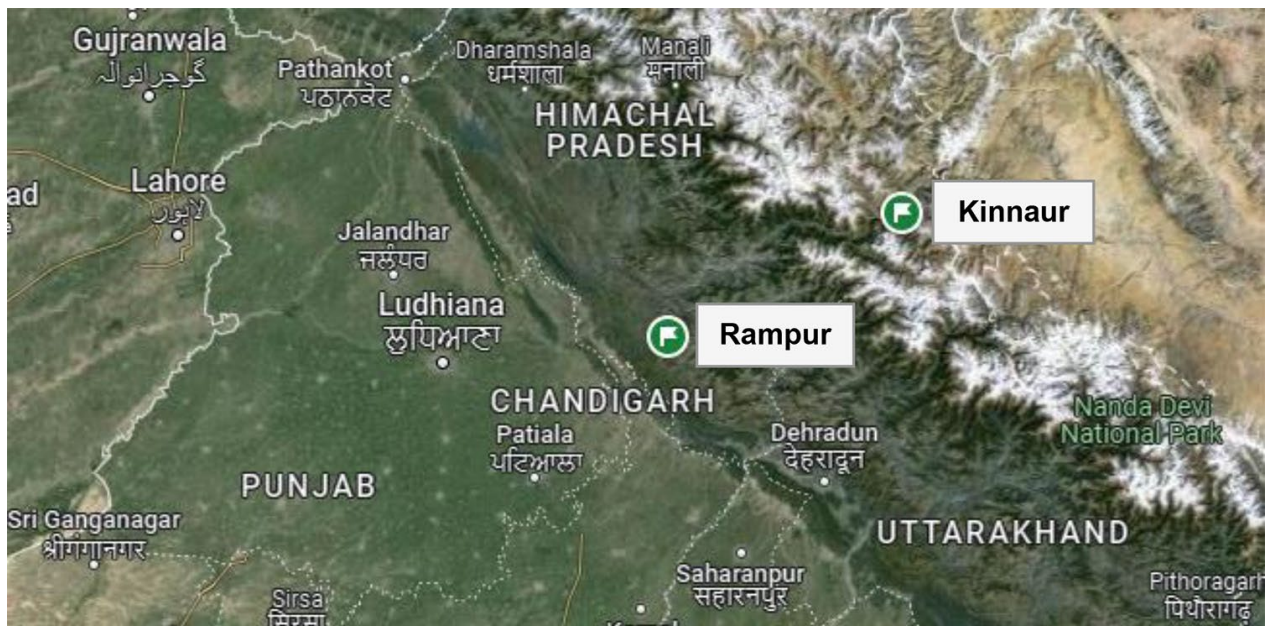

**Appendix Figure 1.** Location of patients presenting with LdHPCL71 and LdHPCL76. The Kinnaur (6050 m above sea level) and Rampur (1020 m above sea level) regions of Himachal Pradesh are indicated on this map and correspond to the location of isolation of LdHPCL71 and LdHPCL76 respectively. The map was generated using Google Maps.

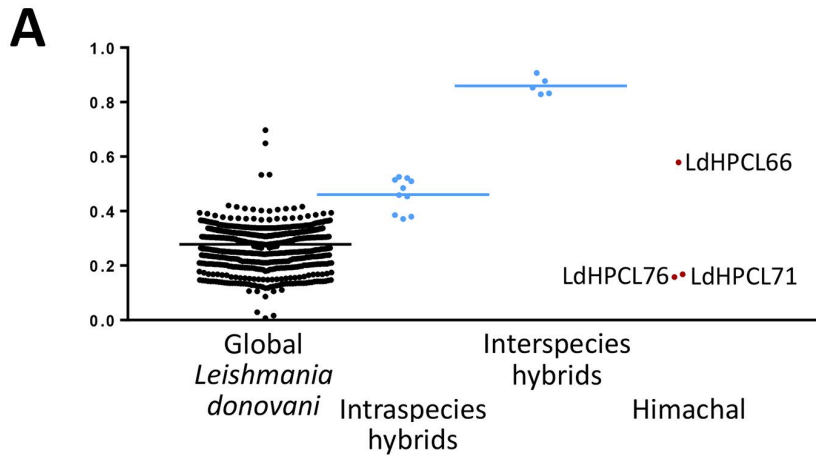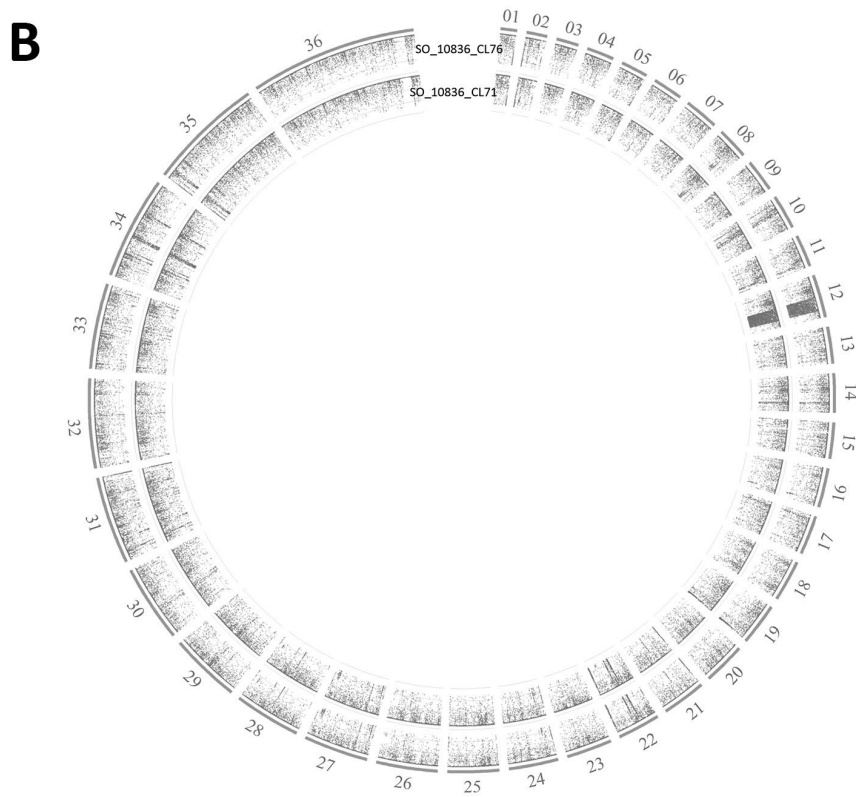

**Appendix Figure 2.** SNP heterozygosity of *L. donovani* isolated from Himachal Pradesh. (A) The heterozygous ratios of the new lineages (LdHPCL71, and LdHPCL76) from Himachal Pradesh are consistent with non-hybrid parasites, in contrast with the previously characterized LdHPCL66. (B) All SNP frequencies are plotted for LdHPCL76 (outer circle) and LdHPCL71 (inner circle) on their corresponding chromosome (1-36). A frequency = 1 is homozygous (outside of the circle), a frequency = 0.5 is heterozygous (middle of the circle) and a frequency = 0 means there is no SNP (inside of the circle). SNP analysis was performed against the SLCL *L. donovani* reference strain.
